# Supplementary material for: Establishing the Signal above the Noise: Accounting for an Environmental Background in the Detection and Quantification of Salmonid Environmental DNA
Source: MDPI journal article supplement (doi:10.3390/fishes7050266), 2022-09-29
Supplement: s1 [file s1]

## Hocking et al. Data README

# gBlock data – eONKI4.csv

# Density data

Fish = Number of fish

Tank = Tank number

TCT = transformed CT (50 - CT)

SCTF refers to summary stats over Sort Code, by Tank and Fish

CT = CT cycle threshold

Biomass in grams

l2Bio =  $\log_2(\text{Biomass})$

numSCTF = number of Sort Codes (samples), by Tank and Fish

# Flow data

Flow = in kL

Tank = Tank number

TCT = transformed CT (50 - CT)

FT refers to summary stats by Flow and Tank

CT = CT cycle threshold

numFT = number of technical replicates by Flow and Tank

ndetects = number of technical replicate detects out of numFT
