# Supplementary material for: Establishing the Signal above the Noise: Accounting for an Environmental Background in the Detection and Quantification of Salmonid Environmental DNA
Source: MDPI journal article supplement (doi:10.3390/fishes7050266), 2022-09-29
Supplement: s1 [file s1]

## **Supplementary Material**

### **Establishing the signal above the noise: Accounting for an environmental background in the detection and quantification of salmonid environmental DNA**

Hocking, M.D.<sup>1,2^</sup>, MacAdams, J.C.<sup>1,2^</sup>, Allison, M.J.<sup>3</sup>, Bergman, L.C.<sup>3</sup>, Sneiderman, R.<sup>4,5</sup>, Koop, B.<sup>6</sup>, Starzomski, B.M.<sup>1</sup>, Lesperance, M.L.<sup>4</sup> and Helbing, C.C.<sup>3\*</sup>

<sup>1</sup> School of Environmental Studies, University of Victoria, Victoria, British Columbia, Canada

<sup>2</sup> Ecofish Research Ltd., Victoria, British Columbia, Canada

<sup>3</sup> Department of Biochemistry and Microbiology, University of Victoria, Victoria, British Columbia, Canada

<sup>4</sup> Department of Mathematics and Statistics, University of Victoria, Victoria, British Columbia, Canada

<sup>5</sup> Department of Analytical Studies, Methodology and Statistical Infrastructure, Statistics Canada, Ottawa, Ontario, Canada

<sup>6</sup> Department of Biology, University of Victoria, Victoria, British Columbia, Canada

<sup>^</sup>Equal First Authorship

\*Corresponding Author: Caren C. Helbing, Phone (250) 721-6146, Fax (250) 721-8855, E-mail [chelbing@uvic.ca](mailto:chelbing@uvic.ca)

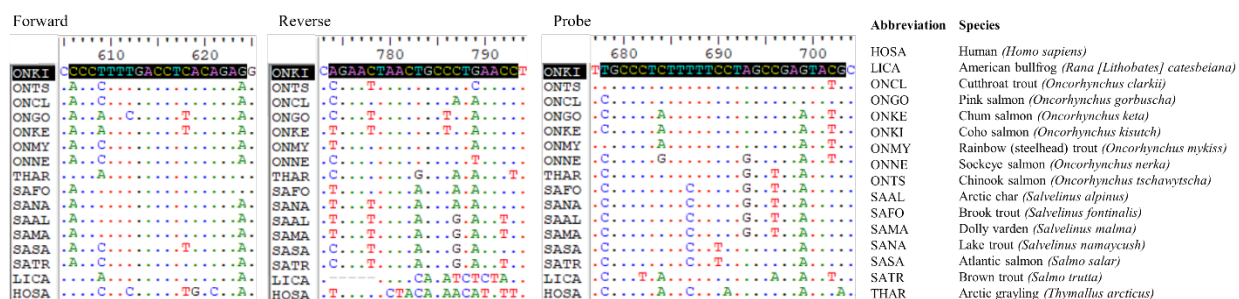

**Figure S1. Sequence alignments of multiple species' *mt-nd1* genes at the forward primer, reverse primer, and probe regions of the eONKI4 assay.** Alignments were conducted using ClustalW (<http://www.genome.jp/tools-bin/clustalw>) and visualized using BioEdit (Ibis Biosciences, Carlsbad, CA, USA).
